# Supplementary material for: The Impact of Potassium Channel Gene Polymorphisms on Antiepileptic Drug Responsiveness in Arab Patients with Epilepsy
Source: PubMed Central journal article supplement (PMC6313615; doi:10.3390/jpm8040037), 2018-11-14
Supplement: jpm-08-00037-s001.pdf [file jpm-08-00037-s001.pdf]

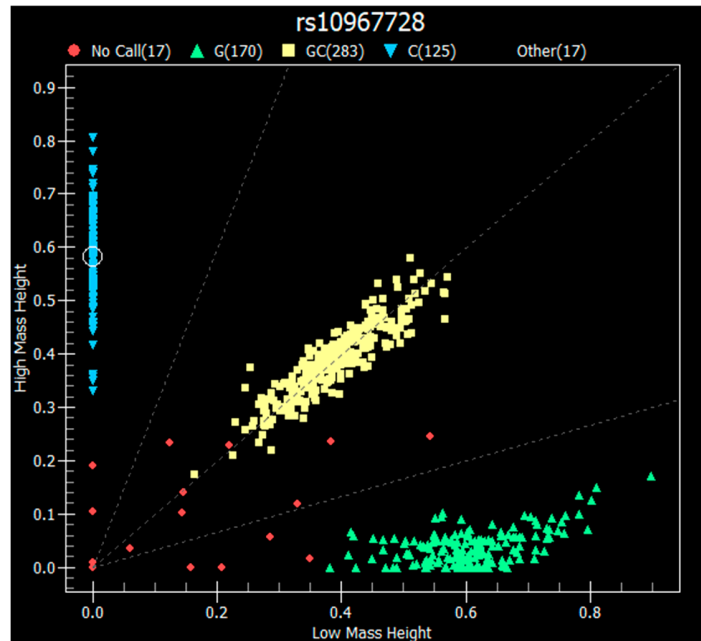

**Figure S1:** A representative scatter plot of rs10967728 SNP from sequenom data. The scatter plot illustrates rs10967728 (G>C) SNP within *KCNV2* gene. The X and Y axes denote mass measurements for the two alleles (G, C, low mass allele versus high mass allele) at the rs10967728 SNP. Every single sample is represented by one point. The points in the scatter plot are colored depending on the genotype calls

**Table S1: SNP IDs, their position and genotyping data based on whole cohort ( $N = 595$ )**

| Genes        | SNP ID      | SNP | Chr Positions | SNP type                             | Discrepancy rate <sup>b</sup> | Call rate <sup>c</sup> |
|--------------|-------------|-----|---------------|--------------------------------------|-------------------------------|------------------------|
| <i>KCNA1</i> | rs2227910   | C/G | 12:4912182    | Synonymous codon                     | 0.02%                         | 98%                    |
|              | rs112561866 | G/A | 12:4912725    | Missense (p.Met449Ile)               | 0.01%                         | 99%                    |
|              | rs7974459   | T/C | 12:4914547    | 3' UTR variant                       | 0.06%                         | 95%                    |
| <i>KCNA2</i> | rs3887820   | G/T | 1:110605458   | 5' UTR variant                       | 0.02%                         | 98%                    |
| <i>KCNV2</i> | rs7029012   | C/G | 9:2717698     | Transcript variant, 5' UTR variant   | 0.03%                         | 98%                    |
|              | rs10967705  | C/G | 9:27117922    | Transcript variant, synonymous codon | 0.01%                         | 99%                    |
|              | rs10967728  | G/C | 9:2721794     | Intronic variant                     | 0.05%                         | 96%                    |

a. Chromosome positions are based on NCBI Human Genome Assembly Build.

b. Ratio of the number of discordant genotypes to the number of duplicates.

c. Ratio of the number of valid genotypes to the number of subjects genotyped ( $N = 595$ ) at each locus

**Table S2: Demographic characteristics of 296 Jordanian unrelated epileptic patients**

| Category                                   | Subcategory              | Good responder           | Poor responder  |
|--------------------------------------------|--------------------------|--------------------------|-----------------|
|                                            | Patients (N, %)          | (162/296) 54.7%          | (134/296) 45.3% |
| <b>Demographics</b>                        | Age <sup>a</sup> [years] | 7.5 [4.0]                | 6.6 [4.1]       |
|                                            | BMI <sup>a</sup>         | 18.5 [10.0]              | 17.0 [6.6]      |
|                                            | Male                     | 56.2%                    | 53.0%           |
|                                            | Female                   | 43.8%                    | 47.0%           |
|                                            | <b>Age at onset</b>      | Age <sup>a</sup> [years] | 3.5 [3.4]       |
| <b>Classification of Epileptic seizure</b> | EGS <sup>b</sup>         | 53.7%                    | 65.7%           |
|                                            | EPS <sup>c</sup>         | 46.3%                    | 34.3%           |
| <b>Subgroups of EGS</b>                    | GM <sup>d</sup>          | 19.8%                    | 46.5%           |
|                                            | GTC <sup>e</sup>         | 80.2%                    | 53.5%           |

<sup>a</sup> Mean Standard deviation in square brackets<sup>b</sup> EGS: Epileptic Generalized Seizure<sup>c</sup> EPS: Epileptic Partial Seizure<sup>d</sup> GM: Generalized Myoclonic<sup>e</sup> GTC: Generalized Tonic Clonic**Table S3: Clinical characteristics of 296 Jordanian unrelated epileptic patients**

| Category        | Subcategory                               | Good responder  | Poor responder  |
|-----------------|-------------------------------------------|-----------------|-----------------|
|                 | Patients (N, %)                           | (162/296) 54.7% | (134/296) 45.3% |
|                 | Family history (N, %)                     | (49/162) 30.2%  | (36/134) 26.9%  |
| <b>Clinical</b> | Non- epilepsy related co-morbidity (N, %) | (7/162) 4.3%    | (9/134) 6.7%    |
|                 | Psychosis (N, %)                          | (5/162) 3.1%    | (8/134) 6.0%    |
|                 | Suicidal thought or action (N, %)         | (1/162) 0.6%    | (1/134) 0.7%    |

**Table S4: Demographic characteristics of 299 Jordanian unrelated healthy individuals**

| Category           | Subcategory              | Control     |
|--------------------|--------------------------|-------------|
| <b>Demographic</b> | Age <sup>a</sup> [years] | 5.9 [3.8]   |
|                    | BMI <sup>a</sup>         | 16.7 [11.2] |
|                    | Male                     | 50.8%       |
|                    | Female                   | 49.2%       |

<sup>a</sup> Mean Standard deviation in square brackets

**Table S5: Characteristics of selected SNPs of potassium channel related genes**

| Genes        | rs numbers  | Global MAF    | Current Study MAF |
|--------------|-------------|---------------|-------------------|
| <i>KCNA1</i> | rs2227910   | G=0.4667/2337 | G=0.39            |
|              | rs112561866 | A=0.00002/3   | A=0.0             |
|              | rs7974459   | T=0.4824/2416 | T=0.39            |
| <i>KCNA2</i> | rs3887820   | A=0.2845/1425 | A=0.1             |
| <i>KCNV2</i> | rs7029012   | C=0.3281/1643 | NA*               |
|              | rs10967705  | C=0.3397/1701 | C=0.4             |
|              | rs10967728  | C=0.4860/2434 | C=0.46            |

\*NA: not applicable

MAF: major allele frequency

**Table S6:** Frequencies of the haplotypes of *KCNA1* and *KCNV2* genes in the 172 generalized epileptic patients and 299 healthy controls

| Gene         | Haplotypes | GEs (%) | Controls (%) | Odds ratio (95% CI) | P value |
|--------------|------------|---------|--------------|---------------------|---------|
| <i>KCNA1</i> | CGT        | 0.034   | 0.048        | 0.71 (0.39 - 1.30)  | 0.27    |
|              | CGC        | 0.582   | 0.562        | 1.00                | –       |
|              | GGT        | 0.346   | 0.347        | 0.97 (0.77 - 1.23)  | 0.8     |
| <i>KCNV2</i> | CCG        | 0.319   | 0.313        | 0.99 (0.72 - 1.37)  | 0.96    |
|              | GGG        | 0.201   | 0.188        | (0.69 - 1.52)       | 0.91    |
|              | GGC        | 0.389   | 0.383        | 1.00                | –       |

\**p* value < 0.05 is considered significant

**Table S7:** Frequencies of the haplotypes of *KCNA1* and *KCNV2* genes in the 134 poor responder patients and 162 good responder patients

| Gene         | Haplotypes | Poor responder (%) | Good responder (%) | Odds ratio (95% CI) | P value |
|--------------|------------|--------------------|--------------------|---------------------|---------|
| <i>KCNA1</i> | CT         | 0.039              | 0.029              | 1.23 (0.50 - 3.05)  | 0.65    |
|              | CC         | 0.598              | 0.569              | 1.00                | –       |
|              | GT         | 0.337              | 0.355              | 0.92 (0.66 - 1.29)  | 0.64    |
| <i>KCNV2</i> | CCG        | 0.328              | 0.327              | 0.96 (0.65 - 1.42)  | 0.85    |
|              | GGG        | 0.148              | 0.199              | 0.92 (0.58 - 1.44)  | 0.71    |
|              | GGC        | 0.394              | 0.389              | 1.00                | –       |

\**p* value < 0.05 is considered significant
